# Supplementary material for: ESMvis: a tool for visualizing individual Experience Sampling Method (ESM) data
Source: PubMed Central journal article supplement (PMC8528801; doi:10.1007/s11136-020-02701-4), 2020-11-22

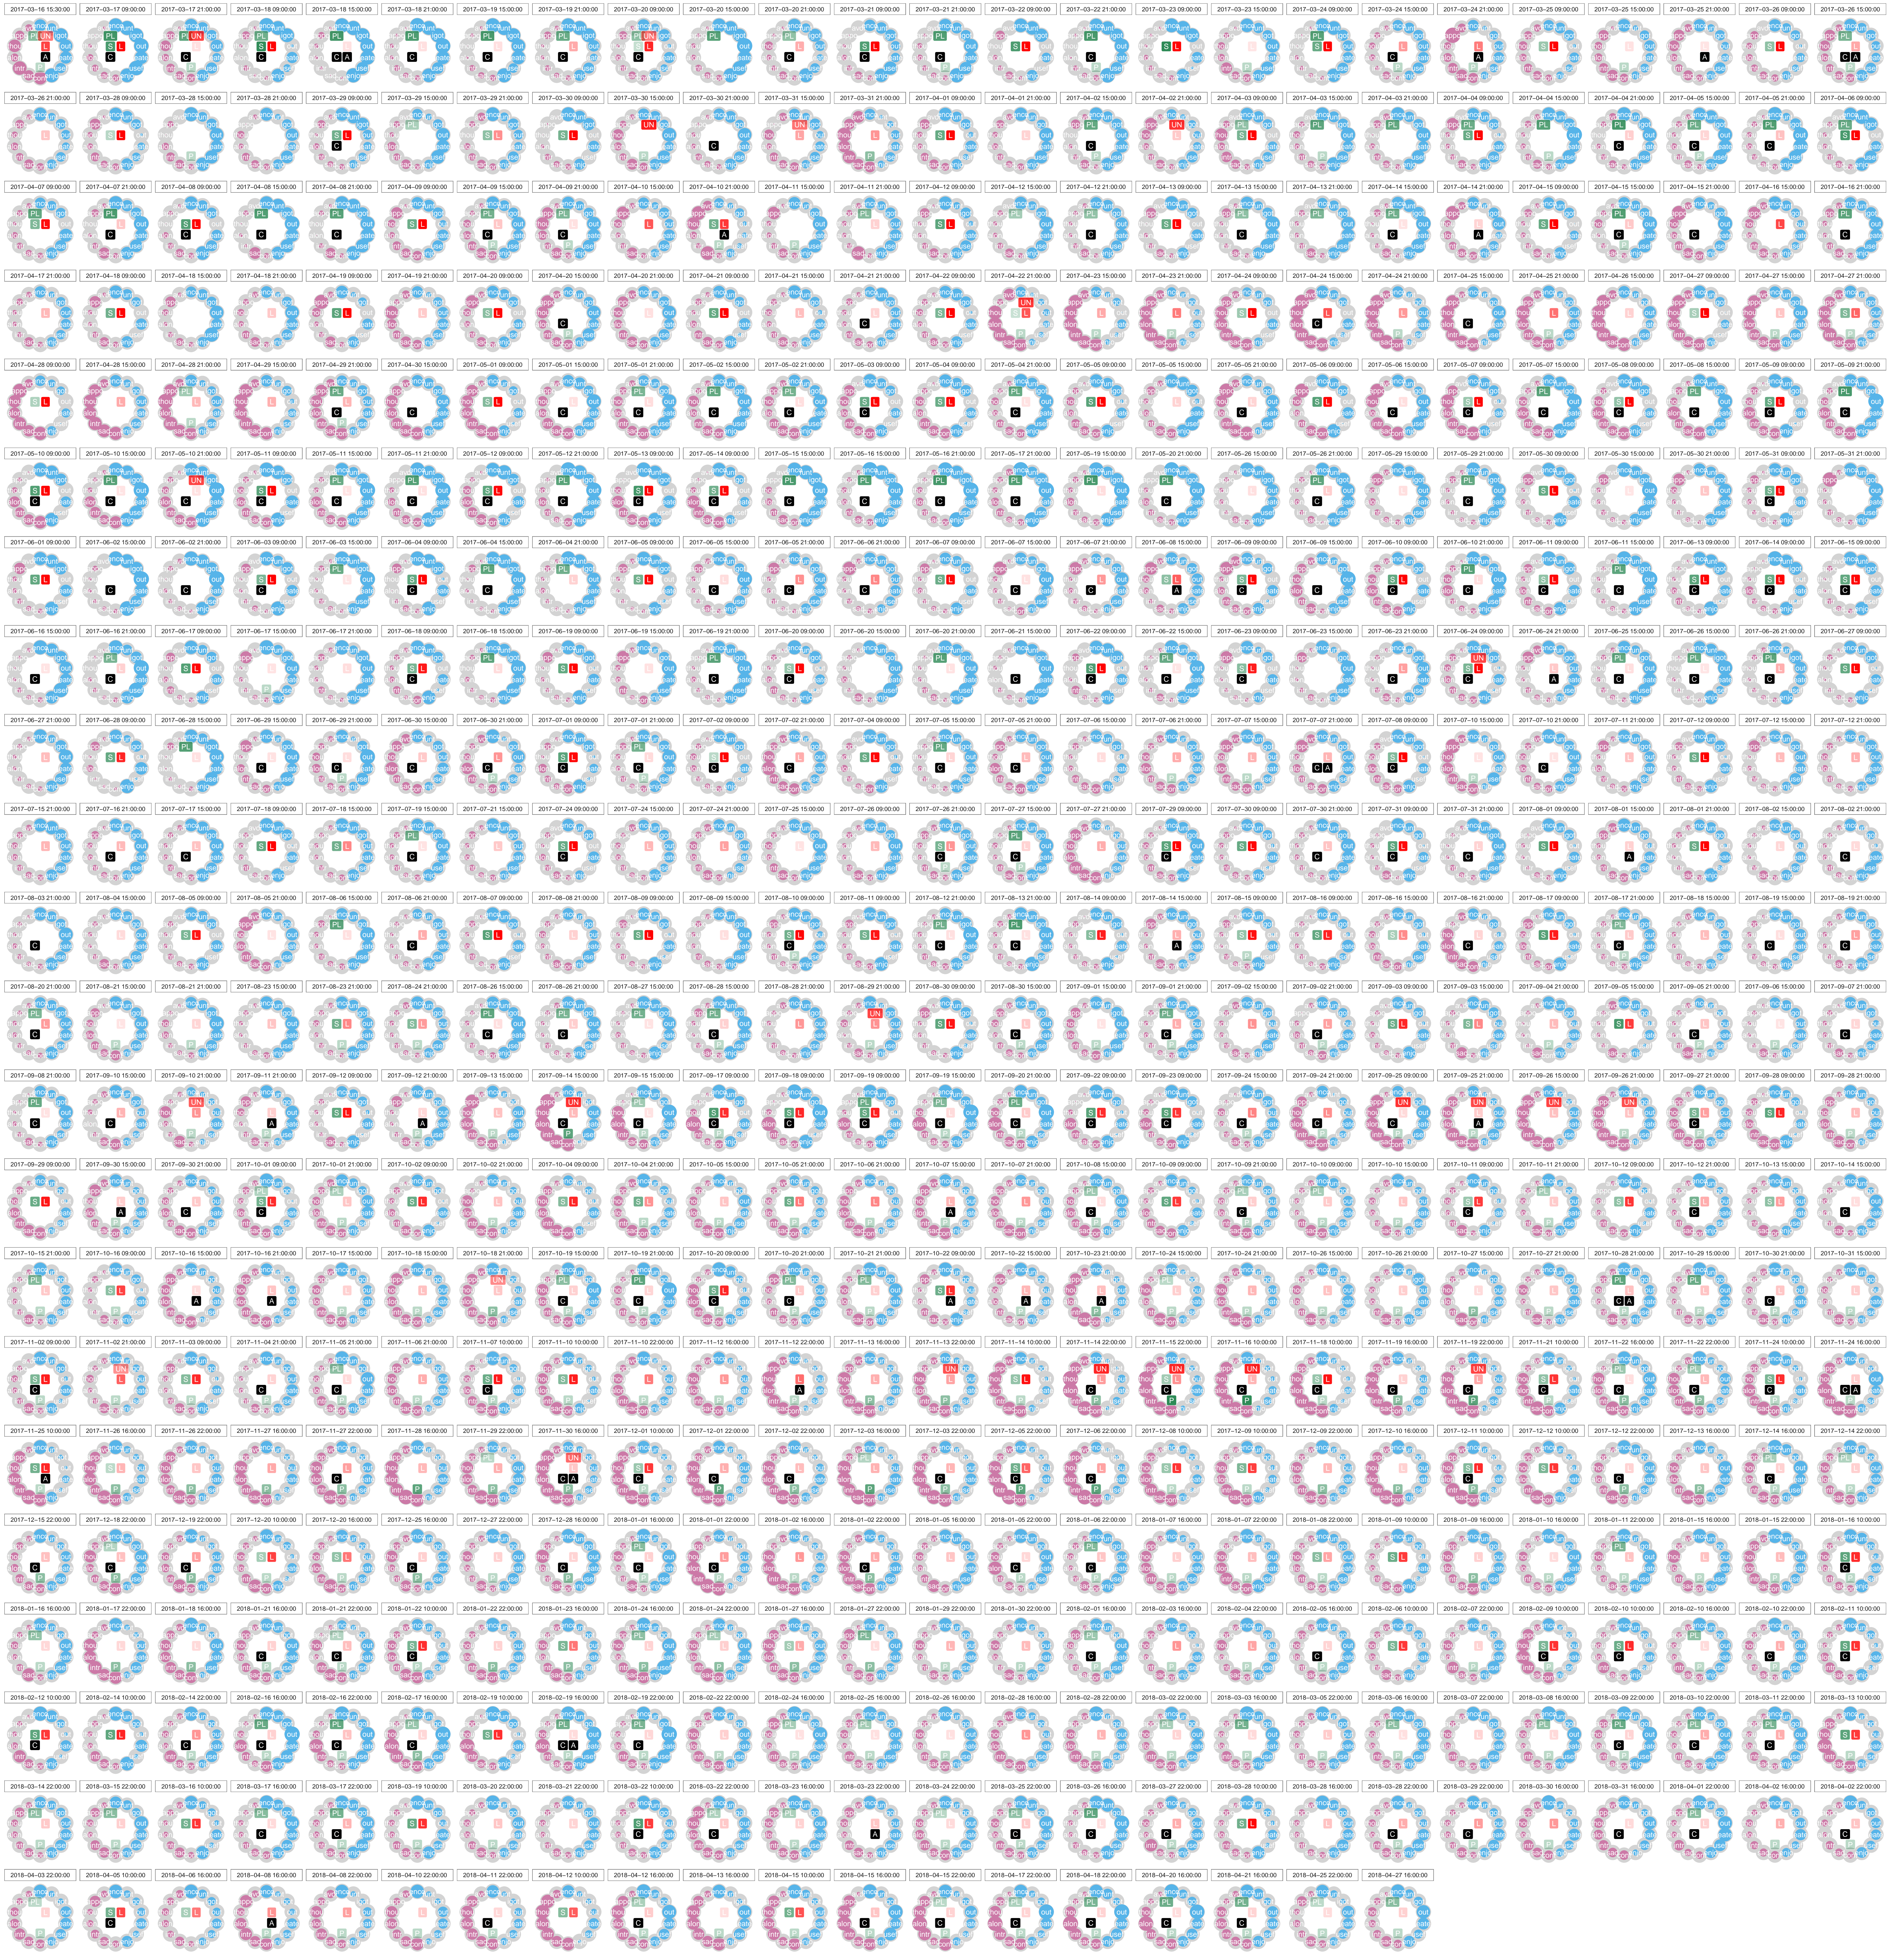

Supplement: 11136_2020_2701_MOESM1_ESM.pdf [file 11136_2020_2701_MOESM1_ESM.pdf]
